# Supplementary material
Source: Springer Nature journal article supplement (https://www.springermedizin.de/resource/supplementary/13048_2009_15_MOESM1_ESM.pdf/9664750)

**A.**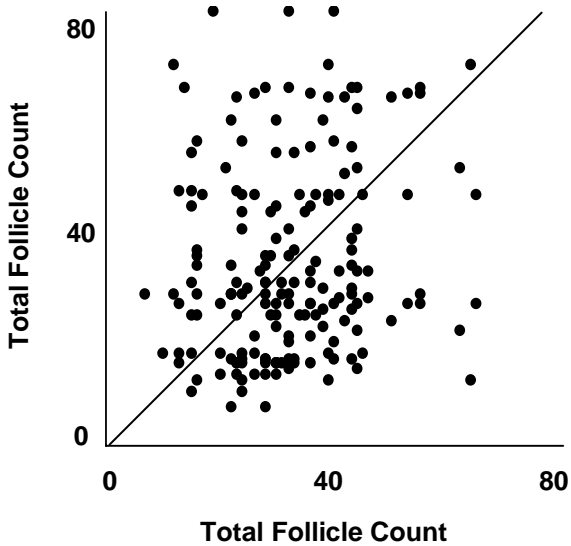**B.**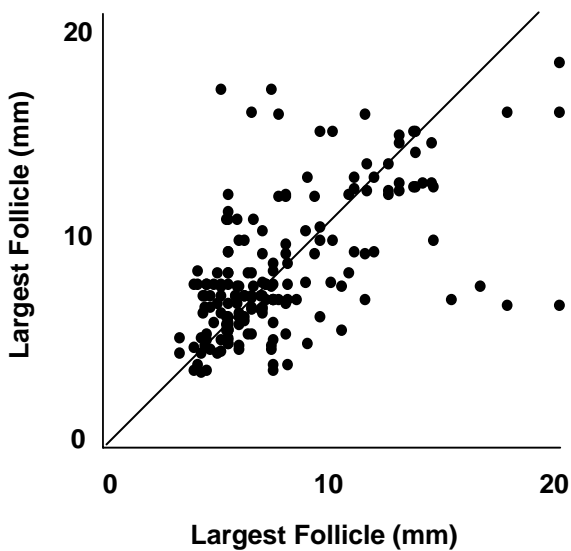**C.**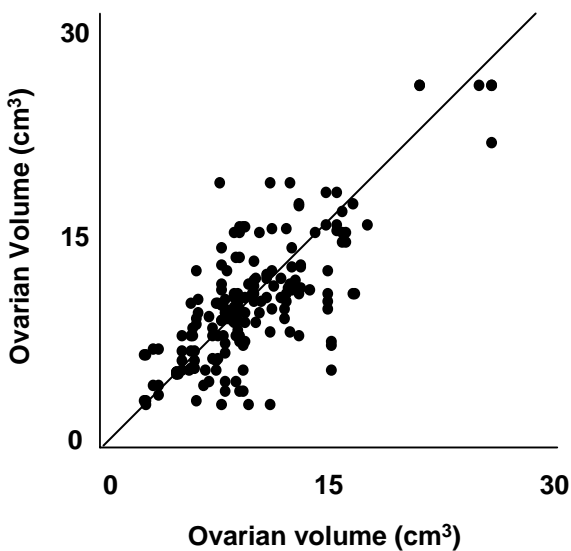

Supplement: MOESM1 [file 9664750]
